# Supplementary material for: Gut Dysbiosis and Immune System in Atherosclerotic Cardiovascular Disease (ACVD)
Source: MDPI journal article supplement (doi:10.3390/microorganisms10010108), 2022-01-05
Supplement: s1 [file s1]

**Table S1: The role of gut microbiota in TMA and TMAO pathways.**

↓ indicates decreasing whereas ↑ indicates increasing.

| Species        | Alternation of Gut Microbiota Taxonomy                                                                                | Proposed mechanisms                                                                                                                                                                                                                                                                                                                                                                                                                                                       | Reference                                                    |
|----------------|-----------------------------------------------------------------------------------------------------------------------|---------------------------------------------------------------------------------------------------------------------------------------------------------------------------------------------------------------------------------------------------------------------------------------------------------------------------------------------------------------------------------------------------------------------------------------------------------------------------|--------------------------------------------------------------|
| Human          | Stroke patients compared to controls:<br>↑ <i>Lactobacillus ruminus</i>                                               | ↑ <i>L. ruminis</i> → ↑ inflammation in stroke patients (↑ IL-6)                                                                                                                                                                                                                                                                                                                                                                                                          | 1) Yamashiro et al., 2017, PLOS One                          |
|                | Ischemic stroke independently associated with: ↑ <i>Atopobium</i> cluster<br>↑ <i>L. ruminus</i><br>↓ <i>L. sakei</i> | Ischemic stroke → ↓ acetic acid + ↑ valeric acid<br>↓ acetic acid → ↑ HbA1c + LDL cholesterol<br>↑ valeric acid → ↑ CRP + leukocyte counts                                                                                                                                                                                                                                                                                                                                |                                                              |
|                | T2D associated with:<br>↓ <i>C. coccoides</i>                                                                         | ↓ <i>C. coccoides</i> → ↑ HbA1c + ↑ LDL cholesterol + ↑ CRP + IL-6                                                                                                                                                                                                                                                                                                                                                                                                        |                                                              |
|                |                                                                                                                       |                                                                                                                                                                                                                                                                                                                                                                                                                                                                           |                                                              |
| Human and Mice |                                                                                                                       | <u>In humans:</u><br>↑ circulating carnitine, choline, or betaine (dietary precursors to TMA/TMAO) → ↑ risk of myocardial infarction, stroke, or death independent of traditional risk factors, but only when ↑ TMAO levels<br>↑ plasma choline, ↑ betaine, + ↑ TMAO → phosphatidylcholine (PC) metabolism                                                                                                                                                                | 2) Tang & Hazen, 2014, The Journal of Clinical Investigation |
|                | <i>Desulfovibrio desulfuricans</i> degrades choline → TMA via choline-specific TMA lyase cutC/D                       | <u>In mouse models:</u><br>Dietary exposure to TMA or precursors → ↓ Reverse cholesterol transport (RCT), alteration in cholesterol + sterol metabolic pathways<br>↑ Dietary L-carnitine → ↑ atherosclerosis pathogenesis when gut microbiota intact                                                                                                                                                                                                                      |                                                              |
|                | <i>Acinetobacter baumannii</i> : degrades carnitine → TMA via carnitine-specific TMA lyase cntA/B                     | So, ↓ direct TMA precursor/substrate consumption or modifying gut microbial composition → ↓ ability to produce TMA                                                                                                                                                                                                                                                                                                                                                        |                                                              |
|                |                                                                                                                       |                                                                                                                                                                                                                                                                                                                                                                                                                                                                           |                                                              |
| Human and Mice |                                                                                                                       | <u>In humans:</u><br>↑ Plasma levels of choline, TMAO and betaine → ↑ atherosclerosis risk                                                                                                                                                                                                                                                                                                                                                                                | 3) Wang et al., 2011, Nature                                 |
|                |                                                                                                                       | <u>In atherosclerosis prone (C57BL/6J Apoe<sup>-/-</sup>) mice:</u><br>↑ dietary choline, TMAO, + betaine → ↑ ACVD lesion area + ↑ CD36 + SR-A1 in macrophages<br>↑ dietary choline and TMAO → minimal change in plasma choline, ↑ plasma TMAO levels<br>↑ plasma levels of TMAO → ↑ aortic lesion size<br>↑ dietary choline → ↑ lipid-laden macrophage development<br>↑ hepatic FMO3 expression → ↑ atherosclerotic lesion formation, ↓ HDL cholesterol, + ↑ plasma TMAO |                                                              |
|                | None                                                                                                                  | <u>In atherosclerosis prone mice given antibiotics (ABX):</u><br>Admin of d9-PC or d9-choline ≠ ↑ plasma TMAO, but restored when reintroduced to normal mice<br>↑ dietary choline ≠ ↑ macrophage foam cell formation or ↑ atherosclerosis or ↑ CD36 expression<br>Choline supplementation promotes macrophage foam cell formation in a gut-flora-dependent fashion                                                                                                        |                                                              |
|                |                                                                                                                       | <u>In germ free mice:</u><br>Admin of d9-PC or d9-choline ≠ ↑ plasma TMAO but restored when reintroduced to normal mice                                                                                                                                                                                                                                                                                                                                                   |                                                              |
| Human and Mice |                                                                                                                       | <u>Identified pathway:</u><br>dietary PC/choline → gut-flora-formed TMA → hepatic-FMO-formed TMAO                                                                                                                                                                                                                                                                                                                                                                         | 4) Koeth et al., 2013, Nature Medicine                       |
|                | <u>In humans:</u><br>↑ <i>Bacteroides</i> → ↑ plasma TMAO                                                             | ↑ fasting plasma [carnitine] → ↑ risk of coronary artery disease, peripheral artery disease, and overall                                                                                                                                                                                                                                                                                                                                                                  |                                                              |

|       |                                                                                                                                                                                                                                                                                                                                                                                                                                                                                                                                                                                                                                                                                                                                                                                                                                                                                |                                                                                                                                                                                                                                                                                                                                                                                                                                                                                                                                                                                                                                                                                                                                                                                                                                                                                                                                                                                                                                                                                                                                                                                                                                                                                                                                                                                                                                                                                                                                                                |
|-------|--------------------------------------------------------------------------------------------------------------------------------------------------------------------------------------------------------------------------------------------------------------------------------------------------------------------------------------------------------------------------------------------------------------------------------------------------------------------------------------------------------------------------------------------------------------------------------------------------------------------------------------------------------------------------------------------------------------------------------------------------------------------------------------------------------------------------------------------------------------------------------|----------------------------------------------------------------------------------------------------------------------------------------------------------------------------------------------------------------------------------------------------------------------------------------------------------------------------------------------------------------------------------------------------------------------------------------------------------------------------------------------------------------------------------------------------------------------------------------------------------------------------------------------------------------------------------------------------------------------------------------------------------------------------------------------------------------------------------------------------------------------------------------------------------------------------------------------------------------------------------------------------------------------------------------------------------------------------------------------------------------------------------------------------------------------------------------------------------------------------------------------------------------------------------------------------------------------------------------------------------------------------------------------------------------------------------------------------------------------------------------------------------------------------------------------------------------|
|       | <p>↑ <i>Prevotella</i> → ↑↑ plasma TMAO</p> <p>Vegans (compared to omnivores) + ↓ TMAO → ↓ <i>Clostridiaceae</i>, ↓ <i>Peptostreptococcaceae incertae sedis</i>, ↓ <i>Peptostreptococcaceae</i>, ↓ <i>Clostridium</i>, + ↑ <i>Lachnospira</i></p> <p><u>In mice:</u></p> <p>↑ dietary carnitine + ↑ TMA → ↑ <i>Prevotella</i> + ↑ <i>Prevotellaceae Unclassified</i></p> <p>↑ dietary carnitine + ↑ TMAO → ↑ <i>Anaeroplasm</i> + ↓ <i>Porphyromonadaceae</i></p>                                                                                                                                                                                                                                                                                                                                                                                                              | <p>CVD</p> <p>↑↑ fasting plasma [carnitine] → ↑ risk of major adverse cardiac events only when no adjustment made for [TMAO]</p> <p>Vegetarian and vegan fasting TMAO levels &lt; omnivore fasting TMAO levels</p> <p>Vegetarianism/veganism → ↓ dietary l-carnitine or choline → ↓ capacity for synthesis of TMAO from l-carnitine → ↓ TMAO levels → ↓ CVD</p> <p>Omnivores → ↑ dietary l-carnitine → ↑ capacity for synthesis of TMAO from l-carnitine → ↑ atherosclerosis</p> <p><u>In Apoe -/- mice:</u></p> <p>↑ dietary l-carnitine → ↑ plasma carnitine, ↑ production of TMA + TMAO, + ↑↑ disease burden</p> <p>↑ dietary l-carnitine or ↑ dietary choline → ↓ RCT compared to normal chow-fed controls</p> <p>TMAO-containing diet → 35% ↓ in RCT compared to normal chow-fed controls</p> <p>Dietary TMAO supplement → ↓ mRNA hepatic levels of key bile acid synthetic enzymes Cyp7a1 and Cyp27a1 +</p> <p>↓ bile acid transporter expression (Oatp1, Oatp4, Mrp2, Ntcp) in the liver, but not the gut, + ↓ total bile acid pool size</p> <p>ABX + ↑ dietary l-carnitine → ↓ plasma TMA and TMAO levels + complete ↓ dietary l-carnitine-dependent increase in atherosclerosis, but ↑ plasma carnitine concentrations</p> <p>ABX + ↑ dietary l-carnitine or ↑ dietary choline ≠ ↓ RCT compared to normal chow-fed controls</p> <p>So, microbial composition changes → changes in TMAO synthetic capacity → altered sterol metabolism</p> <p>Also, TMAO, rather than carnitine = primary driver of the correlation between carnitine and CVD risk</p> |
| Human | <p><u>In humans with ACVD:</u></p> <p>↑ <i>Streptococcus</i>, ↑ <i>Escherichia</i>, ↓ <i>Bacteroides</i>,</p> <p>↓ <i>Prevotella</i>, ↓ <i>Alistipes shahii</i>,</p> <p>↑ <i>Enterobacteriaceae</i> (<i>Escherichia coli</i>, <i>Klebsiella</i> spp., and <i>Enterobacter aerogenes</i>),</p> <p>↑ <i>Streptococcus</i> spp., ↑ <i>Lactobacillus salivarius</i>, ↑ <i>Solobacterium moorei</i>, ↑ <i>Atopobium parvulum</i> ↑ <i>Ruminococcus gnavus</i>, + ↑ <i>Eggerthella lenta</i></p> <p>↓ butyrate-producing bacteria (<i>Roseburia intestinalis</i> and <i>Faecalibacterium cf. prausnitzii</i>)</p> <p>↑ an unclassified <i>Erysipelotrichaceae</i> bacterium, <i>C. nexile</i>, + <i>S. anginosus</i> encode CutC → ↑ TMA synthetic capacity</p> <p>↑ <i>E. aerogenes</i> and <i>Klebsiella pneumoniae</i> encode the TMA lyase YeaW/X → ↑ TMA synthetic capacity</p> | <p><u>In ACVD patients:</u></p> <p>Metagenomic linkage groups differentially enriched in people with versus without ACVD</p> <p>Gut microbiome showed ↑ potential for transport of simple sugars (phosphotransferase systems) and amino acids, but ↓ potential for biosynthesis of most vitamins, ↓ potential for the synthesis of tetrahydrofolate, changed potential for homocysteine metabolism, ↓ potential for metabolizing glycans (e.g. glycosaminoglycans), ↑ potential for metabolism of glycerolipids and degradation of fatty acids, ↓ potential for synthesis of anti-inflammatory butyrate,</p> <p>↓ module involved in propionate synthesis, ↑ Gut microbial enzymes involved in formation of TMA</p> <p>↑ <i>Enterobacteriaceae</i> in ACVD → ↑ gene module for synthesis of the O-antigen of LPS</p> <p>↓ gram-negative genus <i>Bacteroides</i> → ↓ lipid A synthesis module</p> <p>Alterations in gut microbial functional modules in ACVD and other disease included phosphotransferase transport systems, amino acid transporters, vitamin metabolism, and LPS biosynthesis.</p> <p>Cardiometabolomic disease ↔ ↓ fermentative + ↑ inflammation of the gut microbiome</p>                                                                                                                                                                                                                                                                                                                                                                  |

5) Jie et al., 2017, Nature Communications

|                                                                                                                                                                                                                                                                                                                                                                                                                                                                                                                                                                                                                                                                                                                                                                              |                                                                                                                                                                                                                                                                                                                                                                                                                                                                                                                                                                                                                                                                                                                                                                                                                                                                                                                                                                                                                                                                                                                                                                                                                                                                                                                                                                                                                                                                                                                                                                                                                                                                                                   |                                                            |
|------------------------------------------------------------------------------------------------------------------------------------------------------------------------------------------------------------------------------------------------------------------------------------------------------------------------------------------------------------------------------------------------------------------------------------------------------------------------------------------------------------------------------------------------------------------------------------------------------------------------------------------------------------------------------------------------------------------------------------------------------------------------------|---------------------------------------------------------------------------------------------------------------------------------------------------------------------------------------------------------------------------------------------------------------------------------------------------------------------------------------------------------------------------------------------------------------------------------------------------------------------------------------------------------------------------------------------------------------------------------------------------------------------------------------------------------------------------------------------------------------------------------------------------------------------------------------------------------------------------------------------------------------------------------------------------------------------------------------------------------------------------------------------------------------------------------------------------------------------------------------------------------------------------------------------------------------------------------------------------------------------------------------------------------------------------------------------------------------------------------------------------------------------------------------------------------------------------------------------------------------------------------------------------------------------------------------------------------------------------------------------------------------------------------------------------------------------------------------------------|------------------------------------------------------------|
| <p>Mice</p> <p>n/a</p>                                                                                                                                                                                                                                                                                                                                                                                                                                                                                                                                                                                                                                                                                                                                                       | <p>In transintestinal cholesterol excretion mouse models, FMO3 gene ↓ → regulator of RCT</p> <p>FMO3 antisense oligonucleotide (ASO) treatment → no change in overall health of mice, ↓ hepatic cholesteryl ester levels, ↓ hepatic FMO3 mRNA and protein expression compared to nontargeting control ASO → ↑ TMA + ↓ TMAO</p> <p>FMO3 ASO treatment → ↓↓ intestinal cholesterol absorption, + ↑ fecal neutral sterol loss in low-cholesterol diet mice + ↓ cholesterol absorption, ↓ VLDL cholesterol levels, ↑ LDL cholesterol levels, but no change in fecal sterol loss in high-cholesterol diet mice</p> <p>So, knockdown (KD) of FMO3 → reorganization of cholesterol balance in a diet-specific manner, suggesting a link between FMO3 and cholesterol and BA metabolism.</p> <p>FMO3 KD → ↓ expression of oxysterol synthetic enzymes Cyp27a1 + Cyp46a1 → ↓ availability of endogenous oxysterol ligands in liver → ↑ SREBP2-driven transcription and ↓ LXR signaling</p> <p>FMO3 KD → ↓ total plasma cholesterol levels, ↑ basal + ↑ LXR agonist-stimulated macrophage RCT, but ↓ biliary cholesterol levels + ↓ intestinal cholesterol absorption</p> <p>FMO3 KD → ↓ LXR activation → ↑ activation of c-Src, ↑ hepatic ER stress (↑ ATF3, CHOP) + inflammation (↑ infiltration of macrophages into the liver, ↑ macrophage-derived proinflammatory cytokine + chemokine expression)</p> <p>FMO3 KD + LXR agonists → ↓ FMO3 ASO-driven hepatic inflammation, c-Src activation, + ER stress</p> <p>Even though chronic TMAO is proatherogenic, it is most likely not involved in the mechanism by which FMO3 inhibitors reorganize cholesterol balance and inflammation of the liver.</p> | <p>6) Warriar et al., 2105, Cell Reports</p>               |
| <p>Human, Mice, and Rat</p> <p><u>In humans:</u></p> <p>↓ <i>Bacteroidetes:Firmicutes</i> ratio → obesity ACVD → ↑ <i>Collinsella</i></p> <p>Healthy controls → ↑ <i>Roseburia</i> + ↑ <i>Eubacterium</i></p> <p>↑ <i>Tenericutes</i> + ↑ <i>Christensenellaceae</i> associated with ↓ BMI, ↓ triglyceride (TG), + ↑ HDL levels → ↑ acetate (SCFA)</p> <p>↑ <i>Peptococcaceae</i>, ↑ <i>Prevotella</i>, + ↓ <i>Faecalibacterium prausnitzii</i> → ↑ TMAO</p> <p><u>In hypertensive animals:</u></p> <p>Observed ↓ microbial diversity and ↓ <i>Bacteroidetes:Firmicutes</i> ratio observed.</p> <p><u>In mice:</u></p> <p>ABX-induced dysbiosis → non-pathogenic <i>Salmonella enterica</i> transport to the mesenteric lymph nodes → T cell response and IgA production</p> | <p><u>In humans:</u></p> <p>Bacterial dysbiosis → overproduction of nitrogenous compounds → disruption of intestinal epithelial tight junctions → translocation of gut bacterial DNA and uremic toxins into circulation: e.g. atherosclerotic plaques include bacterial DNA (mostly <i>Proteobacteria</i>)</p> <p>SCFAs = signaling molecules → bind to G-protein coupled receptors GPR41 and GPR43</p> <p>SCFA bind to GPR43 → regulation of the inflammatory response: both GPR43-deficient mice and germ-free mice → ↑ production of inflammatory mediators</p> <p>SCFAs → inhibit NF-κB → ↓ inflammatory cytokine production</p> <p>Phosphatidylcholine and other TMA containing compounds ( L-carnitine or choline) → metabolized by gut microbiota TMA lyases → release TMA → TMA metabolized by FMOs → produce TMAO</p> <p>Found a dose-dependent association between plasma TMAO levels and platelet aggregation</p> <p>In T2DM, ↑ TMAO levels → ↑ risk of adverse cardiovascular events and mortality, independent of glycemic control</p> <p>Fecal microbiota transplant from lean donor to insulin-resistant people with metabolic syndrome → ↑ insulin sensitivity + ↑ butyrate-producing gut bacteria</p> <p>Insulin → ↓ FMO3 expression → ↑ TMAO levels ; Glucagon → ↑ FMO3 expression → ↓ TMAO levels</p> <p>↓ SCFAs → ↓ insulin sensitivity and ↓ insulin-mediated fat accumulation</p> <p><u>In mice:</u></p> <p>Mice on choline or TMAO supplemented diets → ↑ platelet hyperreactivity and thrombosis risk</p>                                                                                                                                                                 | <p>7) Ahmadmehrabi &amp; Tang, 2017, Curr Opin Cardiol</p> |

---

compared to germ-free mice on the same diet

KD of ↑ FMO3 → ↑ insulin tolerance, ↓ hypercholesterolemia, and ↓ atherosclerosis

↑ SCFAs in high-fat diet fed mice without changing food intake or exercise → ↓ body weight + ↑ insulin sensitivity

GPR41 receptor-deficient mice = systolic hypertensive phenotype, implying SCFA signaling reduces blood pressure

In rats:

TMAO infusion → ↑ the hypertensive effects of angiotensin II

---

Administration of DMB:

↓ the rate of intact *P. mirabilis* conversion of d9-choline → d9-TMA

↓ many bacterial taxa positively associated with TMA, TMAO, or aortic lesion area

↑ many bacterial taxa negatively associated with TMA, TMAO, or aortic lesion area

But the effect varied:

*D. alaskensis* showed ↓ inhibition

DMB = non-lethal inhibitor of *P. mirabilis* → no ↓ cell growth, ↓ TMA lyase activity  
*Proteus penneri* and *Escherichia fergusonii* = choline TMA lyase activity

Cultured  
Mouse  
Cecum  
Bacteria  
and Mice

↑ DMB in cultures of *Proteus penneri* or *Escherichia fergusonii* → ↓ choline utilization → ↓ TMA, but no change in bacterial growth

Proportions of several taxa = aortic root lesion area and plasma [TMA] + [TMAO]

E.g. In male mice, ↑ dietary choline → ↑ *Clostridiaceae* → ↑ plasma [TMA] + [TMAO], + ↑ atherosclerotic lesion area  
But ↑ dietary choline + DMB admin → ↓ *Clostridiaceae*

E.g. In female mice, ↑ dietary choline → ↑ *Clostridiales* → ↑ plasma [TMA] + [TMAO] + ↑ atherosclerotic lesion area

But ↑ dietary choline + DMB admin → ↓ *Clostridiales*

↑ *Lachnospiraceae* + ↑ *Ruminococcus* → ↑ [TMA], [TMAO], + ↑ plaque area

A choline analog, 3,3-dimethyl-1-butanol (DMB) → ↓ microbial choline TMA lyase activity

DMB → ↓ some but not all microbial TMA lyases and inhibits TMA formation from multiple substrates in physiological polymicrobial cultures

Wild type (WT) *E. coli* BL21 strain ≠ carnitine TMA lyase activity

Transformed *E. coli* cells (w/cntA or cntB from *A. baumannii*) ≠ carnitine TMA lyase activity individually

*E. coli* cells (w/cntA + cntB) → expected acquired enzymatic activity → cleaved d9-carnitine → d9-TMA

DMB = non-lethal inhibitor of TMA production by microbes

DMB → ↓ plasma TMAO levels in vivo

8) Wang et al., 2015, Cell Press

DMB → ↓ choline-diet-enhanced macrophage foam cell formation and ↓ atherosclerosis

DMB ≠ effect on choline uptake by the microbes → DMB does not block choline uptake into the cells

Proves concept: ↓ microbial TMA lyase activity → ↓ microbial TMA production → potential therapeutic approach for the prevention or treatment of atherosclerosis

DMB admin, despite no significant effects on circulating cholesterol, choline, and other pro-atherogenic risk factors → ↓ choline-diet-dependent accumulation of both foam cell formation + aortic root atherosclerotic plaque development

Some DMB-induced change in microbial composition → degree of selective pressure is occurring with exposure to the agent → possibility for the development of resistance

---

|                                                              |                                                                                                                                                                                                                                                                                                                                                                                                                                                                                                                                                                                                                                                                                                                                                                       |                                                                                                                                                                                                                                                                                                                                                                                                                                                                                                                                                                                                                                                                                                                                                                                                                                                                                                                                |                                               |
|--------------------------------------------------------------|-----------------------------------------------------------------------------------------------------------------------------------------------------------------------------------------------------------------------------------------------------------------------------------------------------------------------------------------------------------------------------------------------------------------------------------------------------------------------------------------------------------------------------------------------------------------------------------------------------------------------------------------------------------------------------------------------------------------------------------------------------------------------|--------------------------------------------------------------------------------------------------------------------------------------------------------------------------------------------------------------------------------------------------------------------------------------------------------------------------------------------------------------------------------------------------------------------------------------------------------------------------------------------------------------------------------------------------------------------------------------------------------------------------------------------------------------------------------------------------------------------------------------------------------------------------------------------------------------------------------------------------------------------------------------------------------------------------------|-----------------------------------------------|
|                                                              | <p>↑ <i>Clostridiales</i> → ↑ plasma TMA levels</p> <p>↑ S24-7 (<i>Bacteroidetes</i>) → ↓ [TMA],<br/>↓ trend [TMAO], + ↓ ACVD plaque area</p>                                                                                                                                                                                                                                                                                                                                                                                                                                                                                                                                                                                                                         |                                                                                                                                                                                                                                                                                                                                                                                                                                                                                                                                                                                                                                                                                                                                                                                                                                                                                                                                |                                               |
| Human                                                        | <p>↑ <i>Klebsiella</i>, <i>Streptococcus</i>, <i>Haemophilus</i>, +<br/><i>Granulicatella</i> in more severe CAD</p> <p>The bacterial co-abundance groups (CAGs)<br/>→ age, inflammatory markers (hs-CRP and IL-18), blood lipids and dietary fiber intake</p> <p>↑ CAD → ↑ CAG17 (<i>Veillonella</i>,<br/><i>Haemophilus</i>, + <i>Klebsiella</i>) = pathogens<br/>CAG4 (<i>Faecalibacterium</i> and <i>Roseburia</i>) =<br/>10 serum modules → important in<br/>maintenance of normal coronary artery<br/>homeostasis</p> <p>↑ CAD development → ↓ CAGs containing<br/>OTUs from butyric acid-producing<br/><i>Lachnospiraceae</i> and <i>Ruminococcaceae</i></p> <p>Severe CAD → ↑ CAGs containing OTUs<br/>from <i>Ruminococcaceae</i> → ↑ <i>Clostridium</i></p> | <p>Identified 29 metabolite modules associated with coronary artery disease (CAD) phenotypes<br/>Over the course of CAD, the gut microbiome composition changes dramatically, as does the metabolic<br/>phenotype</p> <p>Compared to healthy controls, CAD patients = disruptions in glucose and lipid metabolism, + ↑<br/>inflammation</p> <p>↑ CAG17 → ↑ innate immune response</p> <p>↑ CAD-associated metabolites → ↑ main risk factors of CAD, but ↓ cholesterol<br/>↑ phosphatidylethanolamine, PC, phosphatidylserine, and sphingolipid metabolites → ↓ AS severity and<br/>myocardial markers</p> <p>↑ Taurine + hypotaurine metabolic module → ↓ CAD severity<br/>↑ Aromatic compounds like bacterially produced benzenoids → disrupted CAD development</p> <p>Some bacteria may affect atherosclerosis by modulating host metabolic pathways like taurine,<br/>sphingolipid and ceramide, and benzene metabolism</p> | 9) Liu et al., 2019,<br>Microbiome            |
| Mice                                                         | <p>RSV → gut microbiota remodeling:<br/>↑ <i>Lactobacillus</i> + ↑ <i>Bifidobacterium</i></p>                                                                                                                                                                                                                                                                                                                                                                                                                                                                                                                                                                                                                                                                         | <p>Resveratrol (RSV) admin → ↓ TMAO-induced atherosclerosis in ApoE <math>-/-</math> mice<br/>RSV → gut microbiota remodeling → ↑ bile salt hydrolase activity → ↑ BA deconjugation and fecal<br/>excretion in C57BL/6J and ApoE <math>-/-</math> mice → ↓ BA in the ilea, ↓ gut-liver FXR-FGF15 axis, ↑<br/>CYP7A1 expression, and ↑ liver BA synthesis</p> <p>FXR antagonist = RSV effect on FGF15 and CYP7A1 expression<br/>FXR agonist → ↓ RSV effect on FGF15 and CYP7A1 expression</p> <p>ABX → ↓ RSV inhibition of TMAO-driven atherosclerosis</p> <p>So RSV → ↓ TMA producing bacteria → ↓ [TMAO], ↑ BA synthesis, mediated by FXR-FGF15 axis</p>                                                                                                                                                                                                                                                                      | 10) Chen et al, 2016,<br>mBio                 |
| Human,<br>Mice, and<br>Cultured<br>Human<br>Hepato-<br>cytes | <p>↑ <i>Proteobacteria</i>, <i>Actinobacteria</i>, +<br/><i>Verrucomicrobia</i> → ↑ liver steatosis<br/>↑ <i>Firmicutes</i> + <i>Euryarchaeota</i> → ↓ liver<br/>steatosis<br/>↓ species diversity = ↑ liver steatosis</p>                                                                                                                                                                                                                                                                                                                                                                                                                                                                                                                                            | <p><u>In Humans:</u></p> <p>LPS + peptidoglycan biosynthesis = liver steatosis<br/>124 urine metabolite signals + 80 (plasma) → liver steatosis<br/>Most liver steatosis-associated metabolites = ↓ microbial gene richness<br/>e.g. ↑ BCAAs (plasma + urine) → liver steatosis<br/>e.g. ↓ choline and phosphocholine (plasma) = liver steatosis<br/>↑ choline excretion = liver steatosis<br/>↓ microbial gene richness (steatosis patients) → ↓ plasma PAA</p> <p>↑ microbial gene richness (non-steatotic patients) → ↑ urinary phenylacetylglutamine, plasma acetate<br/>plasma acetate, + plasma TMAO<br/>↑ TMAO (not TMA) = ↓ steatosis by UPLC-MS/MS<br/>Hepatic genes = core immune response to clearance of viral and bacterial infections, alcoholism +<br/>insulin resistance</p>                                                                                                                                   | 11) Hoyles et al,<br>2018, Nature<br>Medicine |

|                |                                                                                                                                                                                                                                                                                                                                                                                                                                                                                                                                                                                                                                                                                                                                                                                                                                                                                                                                                                                                                                                                                                                                                                                                                                                                                        |                                                                                                                                                                                                                                                                                                                                                                                                                                                                                                                                                                                                                                                                                                                                                                                                                                                                                                                                                                 |                                                                                                                                                                                                                                                                                                                                                                                                                                                                                                                                                                                                                                                                                                                                                 |                                        |
|----------------|----------------------------------------------------------------------------------------------------------------------------------------------------------------------------------------------------------------------------------------------------------------------------------------------------------------------------------------------------------------------------------------------------------------------------------------------------------------------------------------------------------------------------------------------------------------------------------------------------------------------------------------------------------------------------------------------------------------------------------------------------------------------------------------------------------------------------------------------------------------------------------------------------------------------------------------------------------------------------------------------------------------------------------------------------------------------------------------------------------------------------------------------------------------------------------------------------------------------------------------------------------------------------------------|-----------------------------------------------------------------------------------------------------------------------------------------------------------------------------------------------------------------------------------------------------------------------------------------------------------------------------------------------------------------------------------------------------------------------------------------------------------------------------------------------------------------------------------------------------------------------------------------------------------------------------------------------------------------------------------------------------------------------------------------------------------------------------------------------------------------------------------------------------------------------------------------------------------------------------------------------------------------|-------------------------------------------------------------------------------------------------------------------------------------------------------------------------------------------------------------------------------------------------------------------------------------------------------------------------------------------------------------------------------------------------------------------------------------------------------------------------------------------------------------------------------------------------------------------------------------------------------------------------------------------------------------------------------------------------------------------------------------------------|----------------------------------------|
|                | <p>↑ microbial gene richness = ↓ KEGG pathways (proteasome, phagosome, insulin resistance, glucagon signaling and non-specific responses to microbial (Gram-negative, viral) infections)</p> <p>Hepatic steatosis → ↑ LPL (lipoprotein lipase)</p> <p>Hepatic steatosis → ↓ short/branched chain acyl-CoA dehydrogenase + insulin receptor</p> <p><u>In mice:</u></p> <p>Fecal microbial communities from donors with hepatic steatosis transplanted into recipient mice</p> <p>Steatosis mice = ↑ hepatic triglycerides, Fabp4 expression, + plasma valine concentration</p> <p>Donor microbiota composition → mouse phenome</p> <p>Steatosis-associated microbiota → hepatic triglycerides, circulating BCAAs + TMAO</p> <p>steatosis mice + PAA → ↑ hepatic triglycerides, ↓ excreted isoleucine</p> <p><u>In primary human hepatocytes:</u></p> <p>PAA → triglyceride accumulation molecular mechanisms, ↑ expression of lipid metabolism genes (<i>LPL</i> and <i>FASN</i>), ↑ <i>INSR</i> expression, ↓ <i>GLUT2</i> expression, ↓ AKT phosphorylation, ↑ short/branched chain acyl-CoA dehydrogenase expression, ↑ utilization of BCAA from medium</p> <p>Metabolic phenotype (↑ BCAAs, AAAs and microbial metabolites) → hepatic steatosis and low microbial gene richness</p> |                                                                                                                                                                                                                                                                                                                                                                                                                                                                                                                                                                                                                                                                                                                                                                                                                                                                                                                                                                 |                                                                                                                                                                                                                                                                                                                                                                                                                                                                                                                                                                                                                                                                                                                                                 |                                        |
| Human and Mice | <p><u>In humans:</u></p> <p>atherosclerosis = ↓ members of <i>Bacteroidetes</i> + <i>Clostridia</i></p> <p><u>In mice:</u></p> <p>ABX → ↑ cecal content weight, ↓ cecal content DNA (bacterial count), ↓ α-diversity → ↑ atherosclerotic lesion size</p> <p>ABX → ↑<i>Brucellaceae</i> (normal diet), ↑<i>Streptococcaceae</i> (Western diet)</p> <p>↑<i>Clostridia</i> (<i>Lachnospiraceae</i>, <i>Ruminococcaceae</i>) + <i>Bacteroidetes</i> (<i>Porphyromonadaceae</i>, <i>Rikenellaceae</i>) = ↑Tryptophan metabolism + secondary bile acid metabolism</p>                                                                                                                                                                                                                                                                                                                                                                                                                                                                                                                                                                                                                                                                                                                        | <p><u>In humans:</u></p> <p>Human subjects w/carotid atherosclerosis→ ↓ serum tryptophan, ↑ long-chain fatty acids, ↑ monohydroxy fatty acids, ↓ guanidinobutanoate</p> <p><u>In mice:</u></p> <p>ApoE-/- + ABX → ↑ atherosclerotic lesion size</p> <p>ApoE-/- + Western diet → ↑ atherosclerotic development at aortic root level</p> <p>Western Diet → ↓ α-diversity→ ↓ metabolic diversity (serum) → ↑ atherosclerosis + lesion size</p> <p>Tryptophan supplementation alone ≠ atherosclerosis</p> <p>ABX + tryptophan supplementation → ↓ aortic lesion size</p> <p>ABX → tryptophan metabolism, secondary bile acid metabolism, pyrimidine metabolism, cytidine containing, polyunsaturated fatty acids and food component/plant</p> <p>Lesion size → ↓ tryptophan metabolism + secondary bile acid metabolism, ↓ fatty acid + dihydroxy fatty acids, ↑ lipid metabolism</p> <p>ABX → ↓ TMAO by antibiotics → no contribution of TMAO to the phenotype</p> | 12) Kappel et al, 2020, Molecular Metabolism                                                                                                                                                                                                                                                                                                                                                                                                                                                                                                                                                                                                                                                                                                    |                                        |
|                | Human                                                                                                                                                                                                                                                                                                                                                                                                                                                                                                                                                                                                                                                                                                                                                                                                                                                                                                                                                                                                                                                                                                                                                                                                                                                                                  | <p>Both atherosclerosis patients = ↓<i>Bacteroides xylanisolvens</i>, <i>Odoribacter splanchnicus</i>, <i>Eubacterium eligens</i>, <i>Roseburia inulinivorans</i>, + <i>Roseburia intestinalis</i></p> <p>Swedish patients = ↓<i>B. xylanisolvens</i> + <i>E. eligens</i>, <i>Bifidobacterium adolescentis</i> + <i>Collinsella aerofaciens</i> vs controls</p> <p>Swedish controls = ↑<i>Bacteroides</i></p>                                                                                                                                                                                                                                                                                                                                                                                                                                                                                                                                                   | <p>Metagenomics of stool samples from atherosclerosis patients in Sweden (n=25) and China (n=385)</p> <p>↑<i>Clostridium</i> sp L2-50, <i>E. eligens</i>, <i>Coprococcus comes</i>, <i>Lachnospiraceae</i> bacterium 1 1 57FAA, + <i>Lachnospiraceae</i> bacterium 5 1 63FAA → ↓CRP</p> <p>↑<i>Anaerostipes hadrus</i>, <i>Turicibacter sanguinis</i>, <i>Akkermansiamuciniphila</i>, <i>Clostridium celatum</i>, <i>Bacteroides finegoldii</i>, + <i>Haemophilus parainfluenzae</i> → ↑HDL</p> <p>↑<i>Bacteroides finegoldii</i>, <i>B. xylanisolvens</i>, + <i>Haemophilus parainfluenzae</i> → ↓WBC and triglycerides</p> <p>Patients = ↑Pathways L-arginine biosynthesis IV (archaeobacteria), I (via L-ornithine), + II (acetyl cycle)</p> | 13) Liu et al, 2020, The FASEB Journal |

|  |                                                                                                                                                                                                                                                                                                                                                                                                                                                                                                                                                                                                                                                                                                                                                                                                                    |                                                                                                                                                                                                                                                                                                                                                                                                                                                                                        |                                                    |
|--|--------------------------------------------------------------------------------------------------------------------------------------------------------------------------------------------------------------------------------------------------------------------------------------------------------------------------------------------------------------------------------------------------------------------------------------------------------------------------------------------------------------------------------------------------------------------------------------------------------------------------------------------------------------------------------------------------------------------------------------------------------------------------------------------------------------------|----------------------------------------------------------------------------------------------------------------------------------------------------------------------------------------------------------------------------------------------------------------------------------------------------------------------------------------------------------------------------------------------------------------------------------------------------------------------------------------|----------------------------------------------------|
|  | <p><i>caccae</i>, <i>B dorei</i>, <i>B fecis</i>, <i>B finegoldii</i>, + <i>B xylanisolvens</i></p> <p>Chinese patients = ↑<i>Firmicutes</i>, <i>Bacteroides fragilis</i>, <i>Streptococcus salivarius</i>, <i>Clostridium nexile</i>, <i>Ruminococcus gnavus</i>, <i>Ruminococcus torques</i>, <i>Escherichia coli</i>, <i>Klebsiella pneumoniae</i>, + <i>Akkermansia muciniphila</i></p> <p>Chinese controls = ↑<i>Faecalibacterium prausnitzii</i>, <i>Prevotella copri</i>, + <i>Bacteroides uniformis</i></p> <p>Both controls = ↑<i>Roseburia inulinivorans</i> + <i>Roseburia intestinalis</i></p> <p>Chinese controls = ↑<i>Bacteroides</i> + ↓<i>Firmicutes</i> vs Swedish controls</p>                                                                                                                  | <p>Controls = ↑Pathways: Starch degradation V (PWY-6737), CDP-diacylglycerol biosynthesis I/II (PWY-5667/PWY0-1319), L-lysine biosynthesis III/VI (PWY-2942/PWY-5097), glycolysis III from glucose (ANAGLYCOLYSIS-PWY), queuosine biosynthesis (PWY-6700), folate transformations II (PWY-3841), N10-formyl-tetrahydrofolate biosynthesis (1CMET2-PWY)</p> <p><i>B xylanisolvens</i>, <i>E eligens</i>, + <i>R inulinivorans</i> = potential probiotics/target for atherosclerosis</p> |                                                    |
|  | <p>Phyla: ApoE-/- → ↑<i>Verrucomicrobia</i></p> <p>Family: ApoE-/- → ↑<i>Ruminococcaceae</i> + <i>Bacteroidaceae</i></p> <p>ApoE-/- → ↓<i>Rikenellaceae</i></p> <p>Genus: ApoE-/- → ↑<i>Bacteroides</i> + <i>Akkermansia</i></p> <p>↑<i>Verrucomicrobia</i>, <i>Bacteroidaceae</i>, <i>Bacteroides</i>, + <i>Akkermansia</i> → ↑ serum total cholesterol, triglyceride (TG), HDL, + LDL</p> <p>↑<i>Ruminococcaceae</i> → ↑ HDL</p> <p>↑<i>Rikenellaceae</i> → ↓ TG and LDL</p> <p>↑<i>Akkermansia</i> + <i>Verrucomicrobia</i> → ↓CXCL5, FGF2, E-Selectin, GPCR, CXCL11, + TIMP2</p> <p>↑<i>Bacteroides</i> + <i>Bacteroidaceae</i> → ↓CXCL5 + CXCL11</p> <p>↑<i>Bacteroides</i> + <i>Bacteroidaceae</i> → ↑CCL22</p> <p>↑<i>Ruminococcaceae</i> → ↓CXCL5 + CXCL11</p> <p>↑<i>Rikenellaceae</i> → ↑FGF2 + GPCR</p> | <p>α-diversity of ApoE-/- + high-fat diet (HFD) = α-diversity of WT mice + HFD</p> <p>Over time, fecal bacteria composition in ApoE-/- mice ≠ WT mice as atherosclerosis developed</p> <p>ApoE-/- = ↑ IFN-γ, IL-6, + MCP-1</p> <p>ApoE-/- = ↑ signaling pathways: fluid shear stress, atherosclerosis, Jak-STAT, + cytokine-cytokine receptor interaction</p> <p>ApoE-/- = ↑ major immune pathways: chemokine, Toll-like receptor signaling</p>                                        | <p>14) Liu et al, 2020, Microbial Pathogenesis</p> |
